# Supplementary material
Source: PubMed Central journal article supplement (PMC5052131)
Supplement: NIHMS815130-supplement-Supp_Fig_3.pdf [file NIHMS815130-supplement-Supp_Fig_3.pdf]

# Supplementary Figure 3

|    | lentiviral tag | sample 1 | sample 2 | sample 3 | sample 4 | # of positive samples |
|----|----------------|----------|----------|----------|----------|-----------------------|
| 1  | 1              |          |          |          |          | 1                     |
| 2  |                |          | 1        |          |          | 1                     |
| 3  | 1              | 1        |          |          |          | 2                     |
| 4  |                | 1        |          |          |          | 1                     |
| 5  |                |          |          | 1        |          | 1                     |
| 6  |                |          |          |          | 1        | 1                     |
| 7  | 1              |          | 1        | 1        |          | 3                     |
| 8  | 1              | 1        | 1        | 1        |          | 4                     |
| 9  | 1              |          |          |          |          | 1                     |
| 10 |                |          | 1        |          |          | 1                     |
| 11 |                |          | 1        |          |          | 1                     |
| 12 | 1              |          | 1        |          |          | 2                     |
| 13 | 1              | 1        | 1        |          |          | 3                     |
| 14 |                | 1        | 1        | 1        |          | 3                     |
| 15 | 1              | 1        |          |          | 1        | 3                     |
| 16 |                |          |          | 1        |          | 1                     |
| 17 |                | 1        |          |          |          | 1                     |
| 18 |                | 1        |          |          |          | 1                     |
| 19 | 1              |          |          |          | 1        | 2                     |
| 20 | 1              |          |          |          |          | 1                     |

total tags sequenced = 20

# tags present in exactly 1 sample = 12

# tags present in exactly 2 samples = 3

$$\hat{N} = S + \frac{(f_1)^2}{2f_2}$$

$$\hat{N} = 20 + \frac{(12)^2}{2 \times 3}$$

$$\hat{N} = 44$$
