# Supplementary material
Source: PubMed Central journal article supplement (PMC5052131)
Supplement: NIHMS815130-supplement-Supp_Fig_6.pdf [file NIHMS815130-supplement-Supp_Fig_6.pdf]

## Supplementary Figure 6

| hPSC experiment sample | sequence reads |
|------------------------|----------------|
| Lin neg replicate 1    | 1189184        |
| Lin neg replicate 2    | 2574531        |
| Lin neg replicate 3    | 2796234        |
| Lin neg replicate 4    | 1112701        |
| Lin neg replicate 5    | 2192998        |
| Lin neg replicate 6    | 1946064        |
| Lin neg replicate 8    | 2201297        |
| Lin neg replicate 9    | 1838262        |
| Lin neg replicate 10   | 7025150        |
| Endo replicate 1       | 2272245        |
| Endo replicate 2       | 2417017        |
| Endo replicate 3       | 2242602        |
| Endo replicate 5       | 1180544        |
| Endo replicate 6       | 722642         |
| Endo replicate 7       | 1360803        |
| Endo replicate 8       | 1477416        |
| Hem replicate 1        | 784341         |
| Hem replicate 2        | 333257         |
| Hem replicate 3        | 1007918        |
| Hem replicate 4        | 1057099        |
| Hem replicate 5        | 1462369        |
| Hem replicate 6        | 7233616        |
| Hem replicate 7        | 2868065        |
| Hem replicate 8        | 3494205        |
| Hem replicate 9        | 1993129        |
| Hem replicate 10       | 1789315        |
| Mes replicate 1        | 910508         |
| Mes replicate 2        | 877073         |
| Mes replicate 3        | 1078692        |
| Mes replicate 4        | 495860         |
| Mes replicate 6        | 1067230        |
| Mes replicate 7        | 1787316        |
| Mes replicate 8        | 978519         |
| Mes replicate 9        | 4076401        |
| Mes replicate 10       | 1727158        |

| neg ctrl experiment sample | sequence reads |
|----------------------------|----------------|
| Endo mCit replicate 1      | 2617422        |
| Endo mCit replicate 2      | 1581080        |
| Endo mCit replicate 3      | 1679044        |
| Endo mCit replicate 4      | 213235         |
| Hem mStr replicate 1       | 1659138        |
| Hem mStr replicate 2       | 2269970        |
| Hem mStr replicate 3       | 1888961        |
| Mes mCer replicate 1       | 6280301        |
| Mes mCer replicate 2       | 413124         |
| Mes mCer replicate 3       | 1570069        |
| Mes mCer replicate 4       | 804127         |

| hEMP experiment 1 sample | sequence reads |
|--------------------------|----------------|
| Endo replicate 1         | 1246803        |
| Endo replicate 2         | 840652         |
| Endo replicate 3         | 953043         |
| Hem replicate 1          | 1160294        |
| Hem replicate 2          | 859364         |
| Hem replicate 3          | 789210         |
| Mes replicate 1          | 97545          |
| Mes replicate 2          | 1545205        |
| Mes replicate 3          | 941272         |
| Lin neg replicate 1      | 1081870        |
| Lin neg replicate 2      | 998882         |
| Lin neg replicate 3      | 1404188        |

| hEMP experiment 2 sample | sequence reads |
|--------------------------|----------------|
| Endo ral replicate 1     | 1249441        |
| Endo ral replicate 2     | 1410173        |
| Endo ral replicate 3     | 1248145        |
| Hem ral replicate 1      | 1327326        |
| Hem ral replicate 2      | 766698         |
| Hem ral replicate 3      | 1004382        |
| Mes ral replicate 1      | 675396         |
| Mes ral replicate 2      | 638379         |
| Mes ral replicate 3      | 234359         |
| Lin neg ral replicate 1  | 1431616        |
| Lin neg ral replicate 2  | 1564562        |
| Lin neg ral replicate 3  | 1310101        |

| hEMP experiment 3 sample | sequence reads |
|--------------------------|----------------|
| Endo replicate 1         | 1918009        |
| Endo replicate 2         | 2382874        |
| Endo replicate 3         | 1868462        |
| Endo replicate 4         | 1942129        |
| Hem replicate 1          | 1651724        |
| Hem replicate 2          | 2282962        |
| Hem replicate 3          | 1868711        |
| Hem replicate 4          | 1812654        |
| Mes replicate 1          | 1651083        |
| Mes replicate 2          | 2329124        |
| Mes replicate 3          | 1712285        |
| Mes replicate 4          | 2264889        |
| Lin neg replicate 1      | 1788908        |
| Lin neg replicate 2      | 1850487        |
| Lin neg replicate 3      | 1820167        |
| Lin neg replicate 4      | 1505202        |
