# Supplementary material
Source: PubMed Central journal article supplement (PMC5052131)

### Supplementary Figure 1

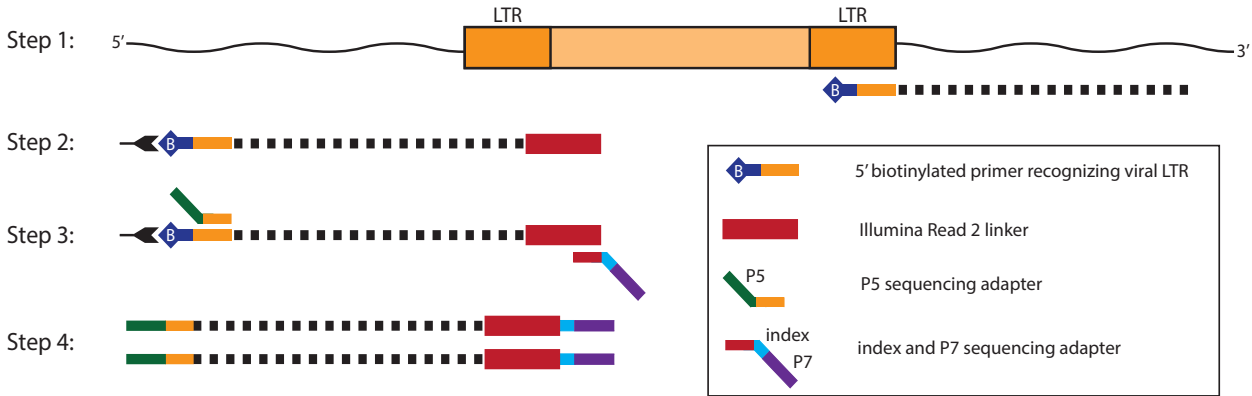

Supplement: NIHMS815130-supplement-Supp_Fig_1.pdf [file NIHMS815130-supplement-Supp_Fig_1.pdf]

## Supplementary Figure 2

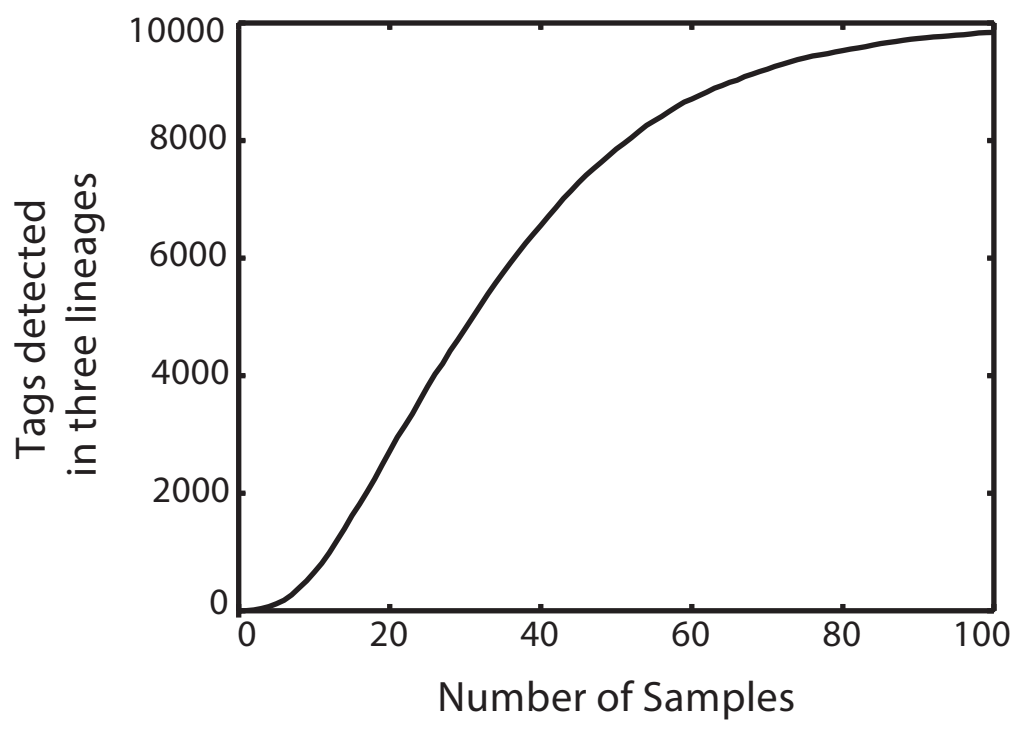

Supplement: NIHMS815130-supplement-Supp_Fig_2.pdf [file NIHMS815130-supplement-Supp_Fig_2.pdf]

## Supplementary Figure 5

VCN detected post RAL treatment

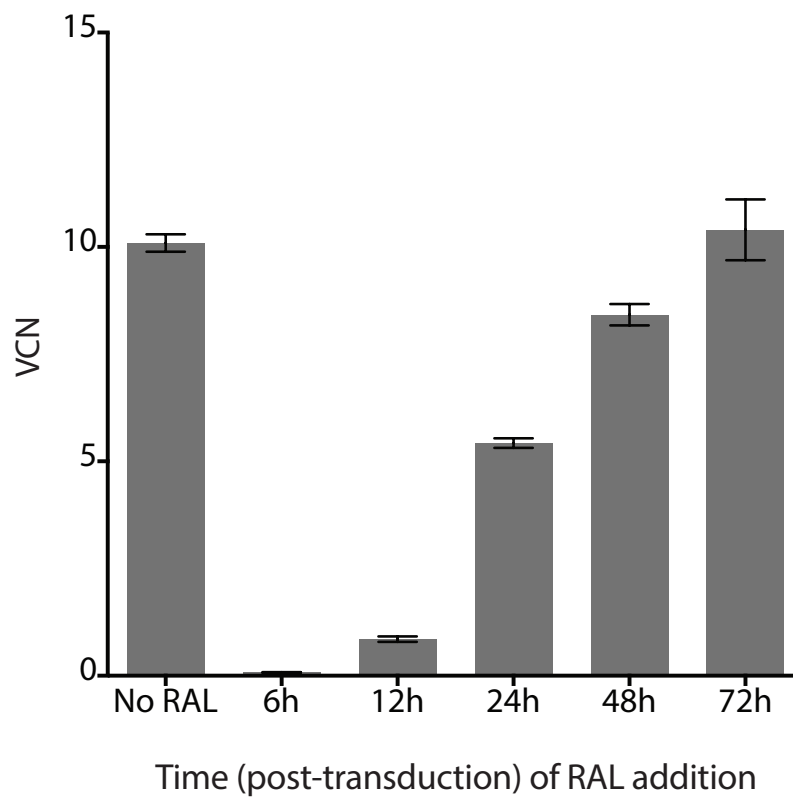

Supplement: NIHMS815130-supplement-Supp_Fig_5.pdf [file NIHMS815130-supplement-Supp_Fig_5.pdf]
